# Supplementary material for: A self-contained all-in-one cartridge for sample preparation and real-time PCR in rapid influenza diagnosis
Source: Royal Society of Chemistry journal article supplement (doi:10.1039/c005265e), 2010-01-01
Supplement: c005265e.pdf [file c005265e.pdf]

## Electronic Supplementary Information

### A self-contained all-in-one cartridge for sample preparation and real-time PCR in rapid influenza diagnosis

Guolin Xu,<sup>a§</sup> Tseng-Ming Hsieh,<sup>a§</sup> Daniel Y. S. Lee,<sup>a</sup> Emril Mohamed Ali,<sup>a</sup> Hong Xie,<sup>a</sup> Xing Lun Looi,<sup>a</sup> Evelyn S.-C. Koay,<sup>b,c</sup> Mo-Huang Li<sup>a\*</sup> and Jackie Y. Ying<sup>a\*</sup>

<sup>a</sup> *Institute of Bioengineering and Nanotechnology, 31 Biopolis Way, The Nanos, Singapore 138669.*

<sup>b</sup> *Department of Pathology, Yong Loo Lin School of Medicine, National University of Singapore, Singapore 119074.*

<sup>c</sup> *Molecular Diagnosis Centre, Department of Laboratory Medicine, National University Hospital, Singapore 119074.*

\* *E-mail: mhli@ibn.a-star.edu.sg; jyying@ibn.a-star.edu.sg.*

§ *These authors contributed equally to this work.*

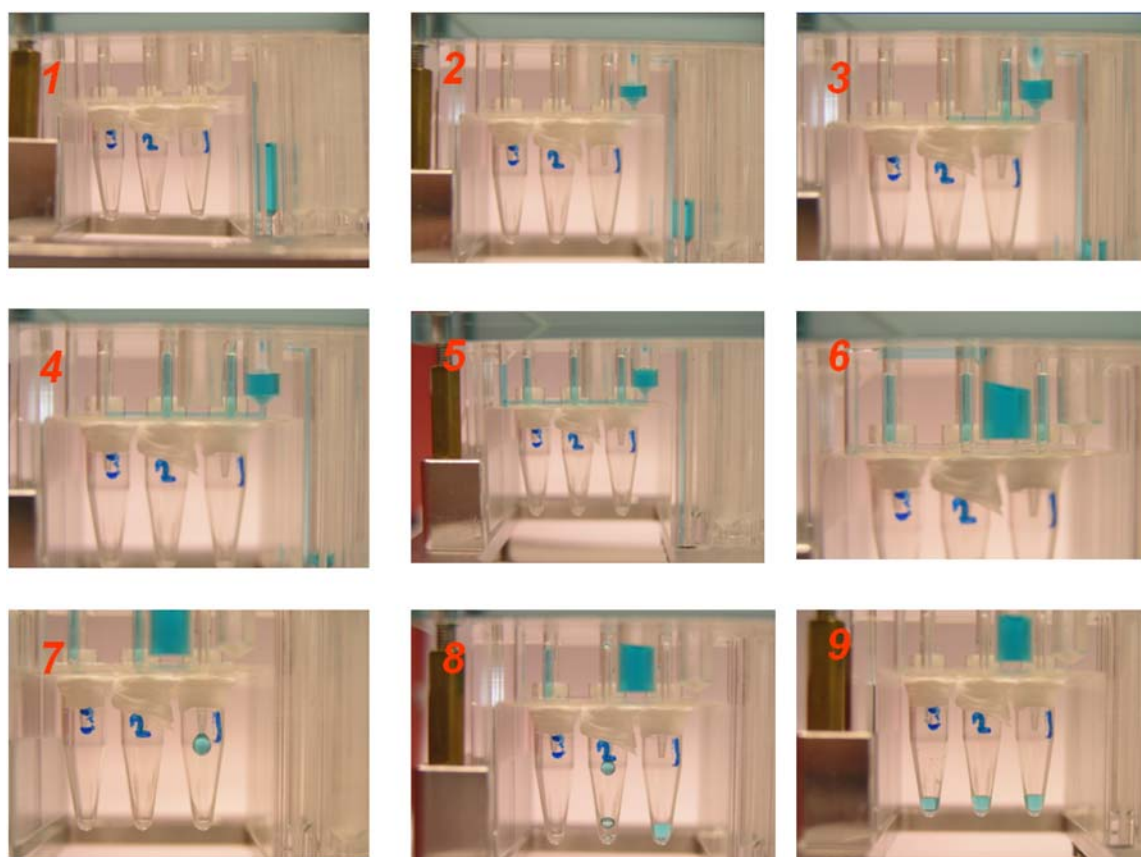

**Fig. S1** Time sequence photographs of aliquot dispensing of RNA eluent, demonstrated with blue food dye. (1) The eluent passed through the silica membrane, and (2) began to fill up the eluent chamber. (3–5) As the eluent chamber was filled, passive valves were sequentially filled up to the constriction. (6) Excess eluent was directed to the excess eluent chamber. Note that the fluid within each aliquot reservoir was isolated. (7–9) Precise dispensing of eluent aliquots into the respective PCR tubes 1–3.

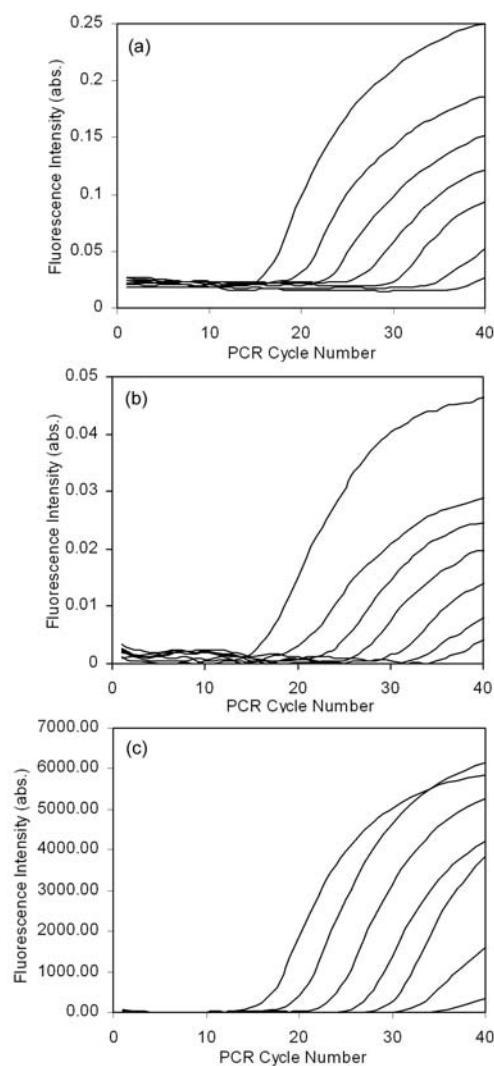

**Fig. S2** On-cartridge real-time PCR. The real-time fluorescence curves of serial diluted ( $1-10^6$  folds) GAPDH cDNA, amplified and measured with (a) the custom-built thermal cycler, (b) the MJ Research Opticon system, and (c) the Bio-Rad CFX96 system. The custom-built thermal cycler utilized LEDs as light source and a PMT for detection, the MJ Research Opticon system employed LEDs plus PMTs, and the Bio-Rad CFX96 system used LEDs and photodiodes.

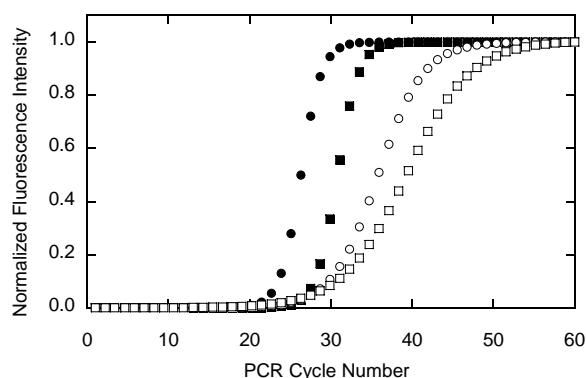

**Fig. S3** On-cartridge real-time PCR. The real-time fluorescence curves of serial diluted ((●) 0-fold, (■) 10-fold, (○)  $10^2$ -fold and (□)  $10^3$ -fold) influenza A, amplified and measured with the custom-built thermal cycler and detection system.

**Table S1**  $C_T$  values of real-time RT-PCR of mouse GAPDH spiked with various amounts of reagents of QIAamp Viral RNA Mini Kit. RT-PCR was performed with Taqman RNA-to- $C_T$  1-Step Kit (4392938, Applied Biosystems) in a Bio-Rad CFX-96 system with 20  $\mu$ l of reaction mixture containing 0.5  $\mu$ l of TaqMan RT Enzyme Mix, 10  $\mu$ l of TaqMan RT-PCR Mix, 1  $\mu$ l of Taqman Assays-by-Design for GAPDH (Mm99999915\_g1), 5.5  $\mu$ l (0.05 ng/ $\mu$ l) of mouse liver total RNA (7810, Ambion), and 3  $\mu$ l of serial diluted reagents ( $1-10^4$  folds diluted in nuclease-free water) of QIAamp kit. The RRT-PCR was conducted at 48°C for 15 min and 95°C for 10 min, with 40 cycles of 95°C for 15 s and 60°C for 60 s. The  $C_T$  value of control experiment with nuclease-free water was 21.52.

| Spiked Chemicals | Vol% of Spiked Chemicals* |                |                |                |
|------------------|---------------------------|----------------|----------------|----------------|
|                  | 15%                       | 1.5%           | 0.15%          | 0.015%         |
| Wash Buffer AW1  | — <sup>†</sup>            | — <sup>†</sup> | — <sup>†</sup> | 22.23          |
| Wash Buffer AW 2 | — <sup>†</sup>            | — <sup>†</sup> | 20.99          | 22.82          |
| Lysis Buffer     | — <sup>†</sup>            | — <sup>†</sup> | 22.81          | — <sup>#</sup> |
| Ethanol          | — <sup>†</sup>            | — <sup>†</sup> | 22.13          | 21.93          |

\* For example, 15 vol% was represented by 3  $\mu$ l of reagent in 20  $\mu$ l of reaction mixture, while 1.5 vol% was represented by 3  $\mu$ l of 10 $\times$  diluted reagent in 20  $\mu$ l of reaction mixture.

<sup>†</sup> The RT-PCR experiment failed.

<sup>#</sup> This experiment was not conducted.

**Table S2**  $C_T$  values of real-time RT-PCR of RNA extracted by the all-in-one system vs. the Qiagen spin column, and the original unpurified sample.

| Total Liver RNA<br>Loaded (ng/ $\mu$ l) | Unpurified Liver<br>RNA ( $C_T$ ) | Qiagen Spin<br>Column ( $C_T$ ) | All-in-One<br>Extraction ( $C_T$ ) |
|-----------------------------------------|-----------------------------------|---------------------------------|------------------------------------|
| 1000                                    | 18.4                              | 19                              | 19.5                               |
| 100                                     | 20.9                              | 23.2                            | 22.5                               |
| 10                                      | 25.3                              | 27.2                            | 26                                 |
| 1                                       | 28.7                              | 29                              | 30.6                               |
| 0.1                                     | 31.9                              | — <sup>†</sup>                  | — <sup>†</sup>                     |

<sup>†</sup> The RT-PCR experiment failed.

**Table S3**  $C_T$  values of the real-time fluorescence curves of serial diluted ( $1-10^4$  folds) influenza A patient samples.

| Influenza A<br>(Dilution Folds) | Qiagen Spin Column<br>+ Bio-Rad CFX96<br>System ( $C_T$ ) | All-in-One Extraction<br>+ Bio-Rad CFX96<br>System ( $C_T$ ) | All-in-One System<br>( $C_T$ ) |
|---------------------------------|-----------------------------------------------------------|--------------------------------------------------------------|--------------------------------|
| 1                               | 23.03                                                     | 24.70                                                        | 25.74                          |
| $10^1$                          | 27.23                                                     | 28.57                                                        | 30.26                          |
| $10^2$                          | 30.14                                                     | 32.40                                                        | 33.03                          |
| $10^3$                          | 33.96                                                     | 35.20                                                        | 37.68                          |
| $10^4$                          | 36.49                                                     | 38.24                                                        | — <sup>†</sup>                 |

<sup>†</sup> The RT-PCR experiment failed.
